# Supplementary material for: Salidroside Ameliorates Mitochondria-Dependent Neuronal Apoptosis after Spinal Cord Ischemia-Reperfusion Injury Partially through Inhibiting Oxidative Stress and Promoting Mitophagy
Source: Hindawi journal article supplement (doi:10.1155/2020/3549704), 2020-07-23

Supplementary material

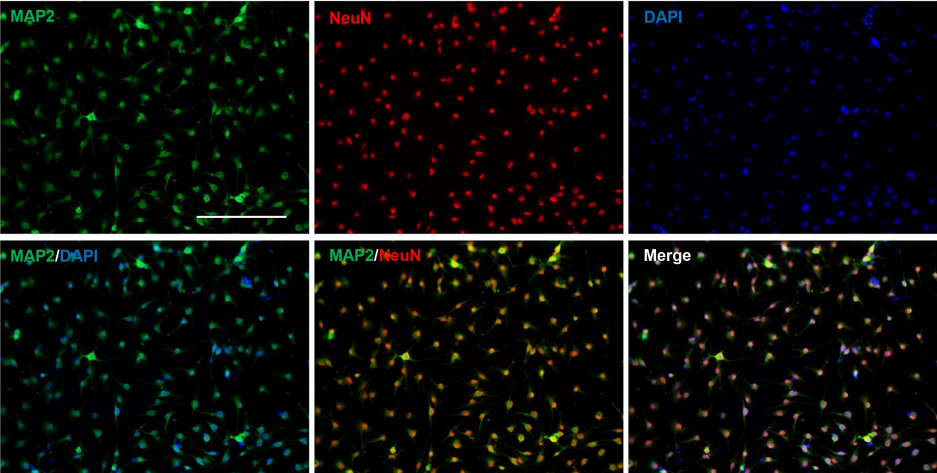

Supplement: f1 [file 3549704.f1.pdf]
